# Supplementary material
Source: publisher figshare collection journal article supplement (https://acs.figshare.com/ndownloader/files/4277446)
Supplement: Supplementary file 1 [file 4277446]

 
data_TBBPA_HMTA 
 
_audit_creation_method            SHELXL-97 
_chemical_name_systematic 
; 
 ? 
; 
_chemical_name_common             ? 
_chemical_melting_point           ? 
_chemical_formula_moiety          ? 
_chemical_formula_sum 
 'C21 H24 Br4 N4 O2' 
_chemical_formula_weight          684.08 
 
loop_ 
 _atom_type_symbol 
 _atom_type_description 
 _atom_type_scat_dispersion_real 
 _atom_type_scat_dispersion_imag 
 _atom_type_scat_source 
 'C'  'C'   0.0033   0.0016 
 'International Tables Vol C Tables 4.2.6.8 and 6.1.1.4' 
 'H'  'H'   0.0000   0.0000 
 'International Tables Vol C Tables 4.2.6.8 and 6.1.1.4' 
 'N'  'N'   0.0061   0.0033 
 'International Tables Vol C Tables 4.2.6.8 and 6.1.1.4' 
 'O'  'O'   0.0106   0.0060 
 'International Tables Vol C Tables 4.2.6.8 and 6.1.1.4' 
 'Br'  'Br'  -0.2901   2.4595 
 'International Tables Vol C Tables 4.2.6.8 and 6.1.1.4' 
 
_symmetry_cell_setting            Triclinic 
_symmetry_space_group_name_H-M    P-1 
 
loop_ 
 _symmetry_equiv_pos_as_xyz 
 'x, y, z' 
 '-x, -y, -z' 
 
_cell_length_a                    7.3315(4) 
_cell_length_b                    11.6404(8) 
_cell_length_c                    14.9647(11) 
_cell_angle_alpha                 103.659(6) 
_cell_angle_beta                  102.636(5) 
_cell_angle_gamma                 90.701(5) 
_cell_volume                      1208.18(14) 
_cell_formula_units_Z             2 
_cell_measurement_temperature     293(2) 
_cell_measurement_reflns_used     5466
_cell_measurement_theta_min       2.57 
_cell_measurement_theta_max       28.79 
 
_exptl_crystal_description        'prism' 
_exptl_crystal_colour             'colorless' 
_exptl_crystal_size_max           0.4 
_exptl_crystal_size_mid           0.15 
_exptl_crystal_size_min           0.15 
_exptl_crystal_density_meas       ? 
_exptl_crystal_density_diffrn     1.880 
_exptl_crystal_density_method     'not measured' 
_exptl_crystal_F_000              668 
_exptl_absorpt_coefficient_mu     6.688 
_exptl_absorpt_correction_type    'multi-scan' 
_exptl_absorpt_correction_T_min   0.312 
_exptl_absorpt_correction_T_max   0.367
_exptl_absorpt_process_details    
;
CrysAlisPro, Agilent Technologies,
Version 1.171.34.49 (release 20-01-2011 CrysAlis171 .NET)
(compiled Jan 20 2011,15:58:25)
Empirical absorption correction using spherical harmonics,
 implemented in SCALE3 ABSPACK scaling algorithm.
;  
 
_exptl_special_details 
; 
 ? 
; 
 
_diffrn_ambient_temperature       293(2) 
_diffrn_radiation_wavelength      0.71073 
_diffrn_radiation_type            MoK\a 
_diffrn_radiation_source          'fine-focus sealed tube' 
_diffrn_radiation_monochromator   graphite 
_diffrn_measurement_device_type   'Xcalibur, Eos' 
_diffrn_measurement_method        '\w scans' 
_diffrn_detector_area_resol_mean  ? 
_diffrn_standards_number          none 
_diffrn_standards_interval_count  none 
_diffrn_standards_interval_time   none 
_diffrn_standards_decay_%         none 
_diffrn_reflns_number             11316 
_diffrn_reflns_av_R_equivalents   0.0354 
_diffrn_reflns_av_sigmaI/netI     0.0935 
_diffrn_reflns_limit_h_min        -9 
_diffrn_reflns_limit_h_max        9 
_diffrn_reflns_limit_k_min        -14 
_diffrn_reflns_limit_k_max        15 
_diffrn_reflns_limit_l_min        -19 
_diffrn_reflns_limit_l_max        18 
_diffrn_reflns_theta_min          2.57 
_diffrn_reflns_theta_max          28.79 
_reflns_number_total              5466 
_reflns_number_gt                 2893 
_reflns_threshold_expression      >2sigma(I) 
 
_computing_data_collection        
;
CrysAlisPro, Agilent Technologies,
Version 1.171.34.49 (release 20-01-2011 CrysAlis171 .NET)
(compiled Jan 20 2011,15:58:25)
;
_computing_cell_refinement        
;
CrysAlisPro, Agilent Technologies,
Version 1.171.34.49 (release 20-01-2011 CrysAlis171 .NET)
(compiled Jan 20 2011,15:58:25)
; 
_computing_data_reduction         
;
CrysAlisPro, Agilent Technologies,
Version 1.171.34.49 (release 20-01-2011 CrysAlis171 .NET)
(compiled Jan 20 2011,15:58:25)
; 
_computing_structure_solution     'SHELXS-97 (Sheldrick, 1990)' 
_computing_structure_refinement   'SHELXL-97 (Sheldrick, 1997)' 
_computing_molecular_graphics     'SHELXL-97 (Sheldrick, 1997)'  
_computing_publication_material   'SHELXL-97 (Sheldrick, 1997)'
 
_refine_special_details 
; 
 Refinement of F^2^ against ALL reflections.  The weighted R-factor wR and 
 goodness of fit S are based on F^2^, conventional R-factors R are based 
 on F, with F set to zero for negative F^2^. The threshold expression of 
 F^2^ > 2sigma(F^2^) is used only for calculating R-factors(gt) etc. and is 
 not relevant to the choice of reflections for refinement.  R-factors based 
 on F^2^ are statistically about twice as large as those based on F, and R- 
 factors based on ALL data will be even larger. 
; 
 
_refine_ls_structure_factor_coef  Fsqd  
_refine_ls_matrix_type            full 
_refine_ls_weighting_scheme       calc  
_refine_ls_weighting_details 
 'calc w=1/[\s^2^(Fo^2^)+(0.0509P)^2^+0.0000P] where P=(Fo^2^+2Fc^2^)/3' 
_atom_sites_solution_primary      direct 
_atom_sites_solution_secondary    difmap 
_atom_sites_solution_hydrogens    geom 
_refine_ls_hydrogen_treatment     mixed 
_refine_ls_extinction_method      none 
_refine_ls_extinction_coef        ? 
_refine_ls_number_reflns          5466 
_refine_ls_number_parameters      328 
_refine_ls_number_restraints      0 
_refine_ls_R_factor_all           0.1041 
_refine_ls_R_factor_gt            0.0452 
_refine_ls_wR_factor_ref          0.1054 
_refine_ls_wR_factor_gt           0.0958 
_refine_ls_goodness_of_fit_ref    0.908 
_refine_ls_restrained_S_all       0.908 
_refine_ls_shift/su_max           0.001 
_refine_ls_shift/su_mean          0.000 
 
loop_ 
 _atom_site_label 
 _atom_site_type_symbol 
 _atom_site_fract_x 
 _atom_site_fract_y 
 _atom_site_fract_z 
 _atom_site_U_iso_or_equiv 
 _atom_site_adp_type 
 _atom_site_occupancy 
 _atom_site_symmetry_multiplicity 
 _atom_site_calc_flag 
 _atom_site_refinement_flags 
 _atom_site_disorder_assembly 
 _atom_site_disorder_group 
Br1 Br 0.89774(7) 0.27125(6) 0.12226(4) 0.0595(2) Uani 1 1 d . . . 
O1 O 0.6508(6) 0.0980(4) 0.1858(3) 0.0522(12) Uani 1 1 d . . . 
H1 H 0.700(8) 0.133(5) 0.230(4) 0.06(2) Uiso 1 1 d . . . 
N1 N 1.1192(7) 0.3502(4) 0.4678(3) 0.0605(14) Uani 1 1 d . . . 
C1 C 0.5590(7) 0.1434(4) 0.1151(3) 0.0334(12) Uani 1 1 d . . . 
Br2 Br 0.25150(8) 0.00641(5) 0.12889(4) 0.05582(19) Uani 1 1 d . . . 
O2 O 0.6975(6) 0.3625(4) -0.3555(3) 0.0589(12) Uani 1 1 d . . . 
H2 H 0.723(7) 0.305(4) -0.387(4) 0.046(18) Uiso 1 1 d . . . 
N2 N 1.1262(7) 0.1346(5) 0.4583(4) 0.0607(14) Uani 1 1 d . . . 
C2 C 0.6395(6) 0.2217(4) 0.0754(3) 0.0319(12) Uani 1 1 d . . . 
Br3 Br 0.62077(9) 0.09358(5) -0.36715(4) 0.05435(19) Uani 1 1 d . . . 
N3 N 0.8877(7) 0.2516(4) 0.5194(3) 0.0547(13) Uani 1 1 d . . . 
C3 C 0.5394(7) 0.2642(5) 0.0033(3) 0.0351(13) Uani 1 1 d . . . 
H3 H 0.596(5) 0.321(3) -0.015(2) 0.001(9) Uiso 1 1 d . . . 
Br4 Br 0.58316(10) 0.59118(5) -0.25093(5) 0.0678(2) Uani 1 1 d . . . 
N4 N 0.8861(6) 0.2130(4) 0.3500(3) 0.0429(11) Uani 1 1 d . . . 
C4 C 0.3515(6) 0.2300(4) -0.0349(3) 0.0293(11) Uani 1 1 d . . . 
C5 C 0.2702(7) 0.1493(4) 0.0019(3) 0.0337(12) Uani 1 1 d . . . 
H5 H 0.136(6) 0.120(4) -0.019(3) 0.028(12) Uiso 1 1 d . . . 
C6 C 0.3729(7) 0.1097(4) 0.0763(3) 0.0310(11) Uani 1 1 d . . . 
C7 C 0.5880(7) 0.3397(5) -0.2995(3) 0.0397(13) Uani 1 1 d . . . 
C8 C 0.5394(7) 0.2278(4) -0.2921(3) 0.0342(12) Uani 1 1 d . . . 
C9 C 0.4274(7) 0.2131(5) -0.2304(3) 0.0359(13) Uani 1 1 d . . . 
H9 H 0.411(6) 0.144(4) -0.223(3) 0.037(14) Uiso 1 1 d . . . 
C10 C 0.3585(6) 0.3102(4) -0.1757(3) 0.0300(11) Uani 1 1 d . . . 
C11 C 0.4067(7) 0.4215(5) -0.1841(4) 0.0355(12) Uani 1 1 d . . . 
H11 H 0.367(5) 0.489(4) -0.146(3) 0.028(12) Uiso 1 1 d . . . 
C12 C 0.5189(7) 0.4351(4) -0.2445(3) 0.0355(12) Uani 1 1 d . . . 
C13 C 0.2382(6) 0.2889(4) -0.1091(4) 0.0370(12) Uani 1 1 d . . . 
C14 C 0.0624(10) 0.2105(8) -0.1688(6) 0.061(2) Uani 1 1 d . . . 
H14C H 0.005(7) 0.244(4) -0.227(4) 0.058(16) Uiso 1 1 d . . . 
H14B H 0.090(7) 0.138(4) -0.196(4) 0.042(18) Uiso 1 1 d . . . 
H14A H -0.016(7) 0.214(5) -0.133(4) 0.06(2) Uiso 1 1 d . . . 
C15 C 0.1802(12) 0.4059(7) -0.0546(6) 0.059(2) Uani 1 1 d . . . 
H15A H 0.306(8) 0.456(5) -0.011(4) 0.060(18) Uiso 1 1 d . . . 
H15B H 0.118(8) 0.388(5) -0.024(4) 0.06(2) Uiso 1 1 d . . . 
H15C H 0.107(7) 0.428(5) -0.099(4) 0.05(2) Uiso 1 1 d . . . 
C16 C 1.0054(9) 0.3577(5) 0.5336(4) 0.0622(17) Uani 1 1 d . . . 
H16A H 0.9265 0.4234 0.5299 0.075 Uiso 1 1 calc R . . 
H16B H 1.0854 0.3747 0.5967 0.075 Uiso 1 1 calc R . . 
C17 C 0.7719(8) 0.2268(5) 0.4224(4) 0.0592(16) Uani 1 1 d . . . 
H17A H 0.6906 0.2911 0.4167 0.071 Uiso 1 1 calc R . . 
H17B H 0.6931 0.1548 0.4104 0.071 Uiso 1 1 calc R . . 
C18 C 1.0055(9) 0.1171(5) 0.3604(4) 0.0609(17) Uani 1 1 d . . . 
H18A H 1.0854 0.1093 0.3158 0.073 Uiso 1 1 calc R . . 
H18B H 0.9281 0.0438 0.3448 0.073 Uiso 1 1 calc R . . 
C19 C 1.0044(8) 0.1538(5) 0.5222(4) 0.0504(15) Uani 1 1 d . . . 
H19A H 1.0803 0.1658 0.5859 0.060 Uiso 1 1 calc R . . 
H19B H 0.9241 0.0822 0.5093 0.060 Uiso 1 1 calc R . . 
C20 C 0.9995(8) 0.3235(5) 0.3738(4) 0.0548(15) Uani 1 1 d . . . 
H20A H 0.9176 0.3875 0.3685 0.066 Uiso 1 1 calc R . . 
H20B H 1.0769 0.3197 0.3283 0.066 Uiso 1 1 calc R . . 
C21 C 1.2365(8) 0.2465(8) 0.4714(5) 0.083(2) Uani 1 1 d . . . 
H21A H 1.3069 0.2372 0.4226 0.100 Uiso 1 1 calc R . . 
H21B H 1.3257 0.2627 0.5319 0.100 Uiso 1 1 calc R . . 
 
loop_ 
 _atom_site_aniso_label 
 _atom_site_aniso_U_11 
 _atom_site_aniso_U_22 
 _atom_site_aniso_U_33 
 _atom_site_aniso_U_23 
 _atom_site_aniso_U_13 
 _atom_site_aniso_U_12 
Br1 0.0346(3) 0.0961(5) 0.0549(4) 0.0384(4) 0.0042(3) -0.0029(3) 
O1 0.065(3) 0.048(3) 0.041(3) 0.022(2) -0.006(2) -0.006(2) 
N1 0.082(4) 0.056(3) 0.038(3) 0.014(2) 0.003(3) -0.026(3) 
C1 0.046(3) 0.032(3) 0.023(3) 0.011(2) 0.004(2) 0.011(2) 
Br2 0.0652(4) 0.0528(4) 0.0576(4) 0.0329(3) 0.0108(3) -0.0114(3) 
O2 0.095(3) 0.037(3) 0.064(3) 0.012(2) 0.059(3) 0.013(2) 
N2 0.058(3) 0.066(4) 0.061(4) 0.016(3) 0.016(3) 0.018(3) 
C2 0.019(2) 0.042(3) 0.035(3) 0.009(2) 0.006(2) 0.000(2) 
Br3 0.0878(5) 0.0353(3) 0.0433(4) 0.0076(3) 0.0237(3) 0.0113(3) 
N3 0.080(3) 0.042(3) 0.051(3) 0.015(2) 0.030(3) 0.014(3) 
C3 0.038(3) 0.039(3) 0.037(3) 0.018(3) 0.016(3) 0.001(3) 
Br4 0.1021(5) 0.0347(3) 0.0882(5) 0.0182(3) 0.0636(4) 0.0043(3) 
N4 0.053(3) 0.045(3) 0.034(3) 0.014(2) 0.011(2) 0.000(2) 
C4 0.032(3) 0.031(3) 0.028(3) 0.008(2) 0.013(2) 0.001(2) 
C5 0.035(3) 0.032(3) 0.036(3) 0.010(2) 0.011(3) 0.002(2) 
C6 0.034(3) 0.029(3) 0.033(3) 0.010(2) 0.011(2) -0.002(2) 
C7 0.053(3) 0.040(3) 0.032(3) 0.012(2) 0.017(3) 0.001(3) 
C8 0.048(3) 0.035(3) 0.018(3) 0.007(2) 0.005(2) 0.000(2) 
C9 0.044(3) 0.029(3) 0.033(3) 0.015(2) -0.003(2) -0.005(3) 
C10 0.026(3) 0.037(3) 0.026(3) 0.015(2) -0.002(2) -0.001(2) 
C11 0.042(3) 0.031(3) 0.036(3) 0.010(2) 0.011(3) 0.002(2) 
C12 0.047(3) 0.026(3) 0.039(3) 0.013(2) 0.016(2) 0.001(2) 
C13 0.028(3) 0.046(3) 0.044(3) 0.022(3) 0.010(2) 0.005(2) 
C14 0.044(4) 0.085(6) 0.062(5) 0.043(5) 0.005(4) -0.004(4) 
C15 0.067(5) 0.065(5) 0.072(6) 0.041(4) 0.044(5) 0.025(4) 
C16 0.076(4) 0.046(4) 0.058(4) 0.004(3) 0.012(4) -0.012(3) 
C17 0.054(4) 0.061(4) 0.068(5) 0.023(3) 0.016(3) 0.011(3) 
C18 0.076(4) 0.057(4) 0.045(4) 0.002(3) 0.013(3) 0.012(3) 
C19 0.074(4) 0.040(3) 0.040(3) 0.016(3) 0.014(3) 0.012(3) 
C20 0.073(4) 0.047(4) 0.052(4) 0.022(3) 0.020(3) 0.001(3) 
C21 0.037(4) 0.148(8) 0.061(5) 0.039(5) -0.008(3) -0.003(5) 
 
_geom_special_details 
; 
 All esds (except the esd in the dihedral angle between two l.s. planes) 
 are estimated using the full covariance matrix.  The cell esds are taken 
 into account individually in the estimation of esds in distances, angles 
 and torsion angles; correlations between esds in cell parameters are only 
 used when they are defined by crystal symmetry.  An approximate (isotropic) 
 treatment of cell esds is used for estimating esds involving l.s. planes. 
; 
 
loop_ 
 _geom_bond_atom_site_label_1 
 _geom_bond_atom_site_label_2 
 _geom_bond_distance 
 _geom_bond_site_symmetry_2 
 _geom_bond_publ_flag 
Br1 C2 1.900(4) . ? 
O1 C1 1.347(6) . ? 
N1 C16 1.412(7) . ? 
N1 C20 1.447(7) . ? 
N1 C21 1.495(8) . ? 
C1 C6 1.373(6) . ? 
C1 C2 1.388(6) . ? 
Br2 C6 1.894(5) . ? 
O2 C7 1.346(6) . ? 
N2 C19 1.427(7) . ? 
N2 C21 1.474(8) . ? 
N2 C18 1.504(7) . ? 
C2 C3 1.365(6) . ? 
Br3 C8 1.883(5) . ? 
N3 C19 1.435(6) . ? 
N3 C16 1.444(7) . ? 
N3 C17 1.472(7) . ? 
C3 C4 1.385(6) . ? 
Br4 C12 1.901(5) . ? 
N4 C18 1.444(7) . ? 
N4 C20 1.449(6) . ? 
N4 C17 1.490(7) . ? 
C4 C5 1.384(6) . ? 
C4 C13 1.537(6) . ? 
C5 C6 1.378(6) . ? 
C7 C8 1.382(6) . ? 
C7 C12 1.390(6) . ? 
C8 C9 1.399(7) . ? 
C9 C10 1.400(7) . ? 
C10 C11 1.380(6) . ? 
C10 C13 1.525(6) . ? 
C11 C12 1.381(7) . ? 
C13 C15 1.531(8) . ? 
C13 C14 1.541(8) . ? 
 
loop_ 
 _geom_angle_atom_site_label_1 
 _geom_angle_atom_site_label_2 
 _geom_angle_atom_site_label_3 
 _geom_angle 
 _geom_angle_site_symmetry_1 
 _geom_angle_site_symmetry_3 
 _geom_angle_publ_flag 
C16 N1 C20 108.6(5) . . ? 
C16 N1 C21 108.7(5) . . ? 
C20 N1 C21 105.7(5) . . ? 
O1 C1 C6 119.3(5) . . ? 
O1 C1 C2 124.8(5) . . ? 
C6 C1 C2 115.9(4) . . ? 
C19 N2 C21 108.5(5) . . ? 
C19 N2 C18 107.2(4) . . ? 
C21 N2 C18 102.9(5) . . ? 
C3 C2 C1 122.2(4) . . ? 
C3 C2 Br1 118.6(4) . . ? 
C1 C2 Br1 119.2(4) . . ? 
C19 N3 C16 108.6(5) . . ? 
C19 N3 C17 105.8(4) . . ? 
C16 N3 C17 107.3(4) . . ? 
C2 C3 C4 121.3(5) . . ? 
C18 N4 C20 109.7(4) . . ? 
C18 N4 C17 107.8(4) . . ? 
C20 N4 C17 105.2(4) . . ? 
C5 C4 C3 117.3(5) . . ? 
C5 C4 C13 122.6(4) . . ? 
C3 C4 C13 119.9(4) . . ? 
C6 C5 C4 120.3(5) . . ? 
C1 C6 C5 122.9(4) . . ? 
C1 C6 Br2 118.4(4) . . ? 
C5 C6 Br2 118.7(4) . . ? 
O2 C7 C8 124.8(5) . . ? 
O2 C7 C12 118.0(5) . . ? 
C8 C7 C12 117.2(4) . . ? 
C7 C8 C9 120.6(5) . . ? 
C7 C8 Br3 119.8(4) . . ? 
C9 C8 Br3 119.6(4) . . ? 
C8 C9 C10 121.5(5) . . ? 
C11 C10 C9 117.4(5) . . ? 
C11 C10 C13 123.3(5) . . ? 
C9 C10 C13 119.2(4) . . ? 
C12 C11 C10 120.6(5) . . ? 
C11 C12 C7 122.7(5) . . ? 
C11 C12 Br4 118.3(4) . . ? 
C7 C12 Br4 119.0(4) . . ? 
C10 C13 C15 111.1(5) . . ? 
C10 C13 C4 109.9(4) . . ? 
C15 C13 C4 106.5(5) . . ? 
C10 C13 C14 108.1(5) . . ? 
C15 C13 C14 109.7(6) . . ? 
C4 C13 C14 111.5(5) . . ? 
N1 C16 N3 114.0(5) . . ? 
N3 C17 N4 112.7(4) . . ? 
N4 C18 N2 113.1(4) . . ? 
N2 C19 N3 116.3(5) . . ? 
N4 C20 N1 113.5(4) . . ? 
N2 C21 N1 113.4(5) . . ? 
 
_diffrn_measured_fraction_theta_max    0.867 
_diffrn_reflns_theta_full              25.00 
_diffrn_measured_fraction_theta_full   0.999 
_refine_diff_density_max    1.095 
_refine_diff_density_min   -0.706 
_refine_diff_density_rms    0.094 
